# Supplementary material
Source: publisher site journal article supplement (https://www.dovepress.com/article/429128)

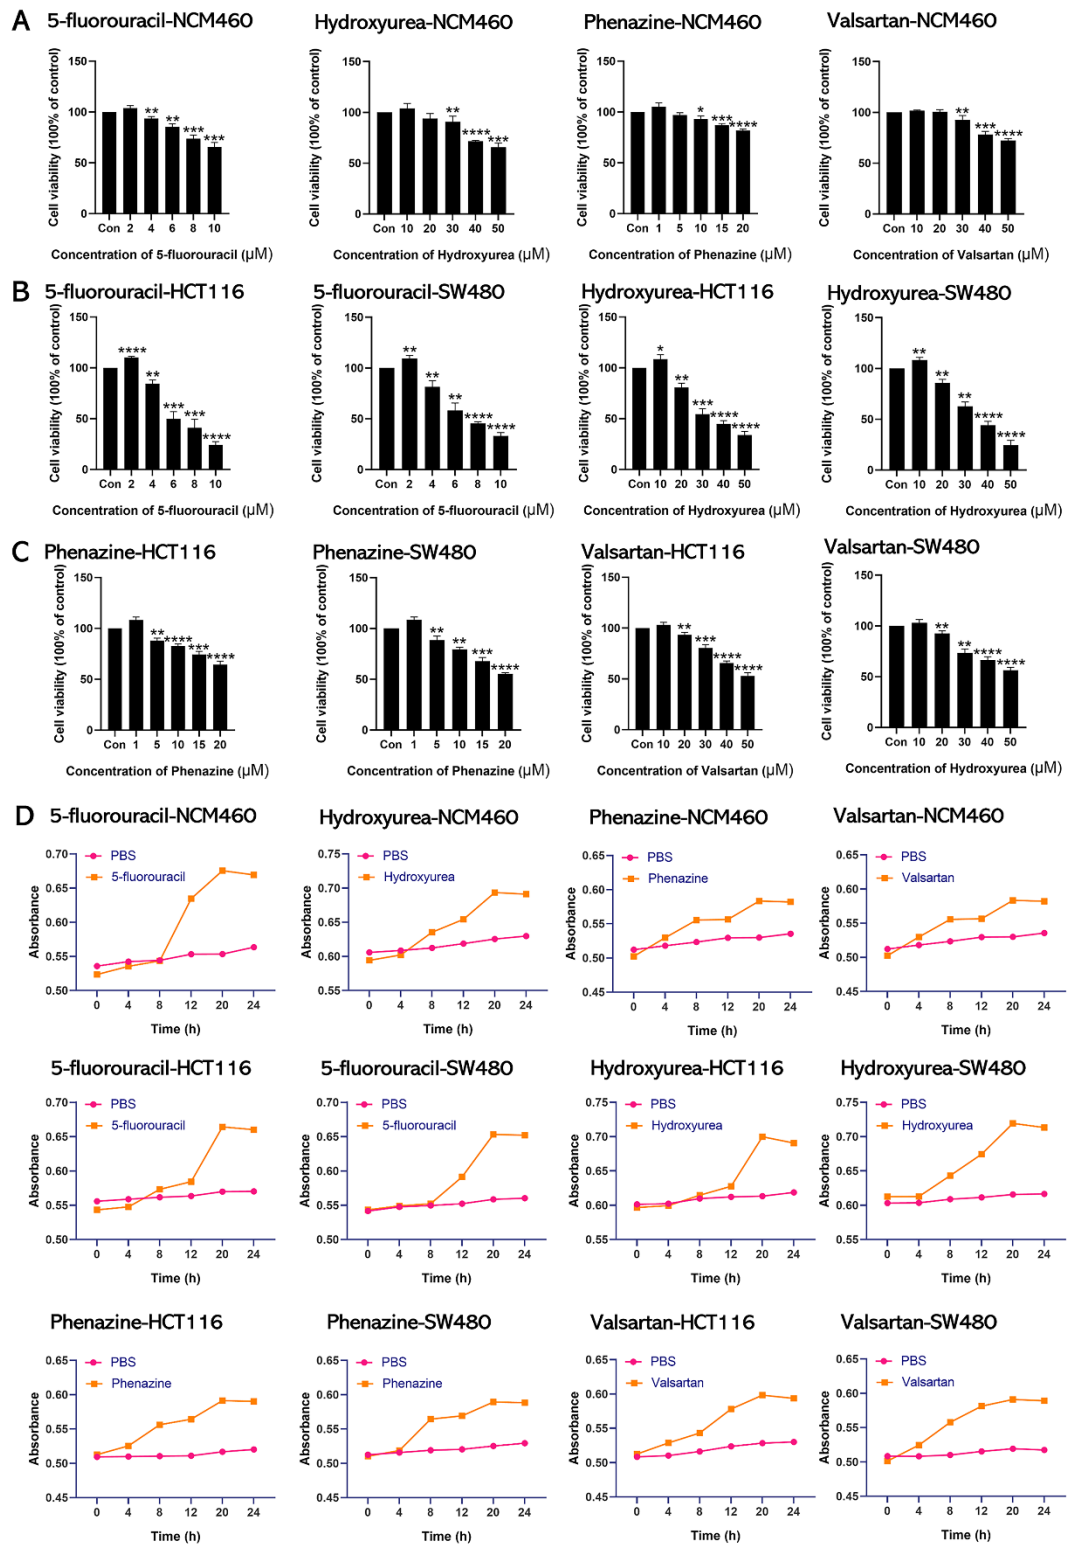

**Figure S1** The effect of 5-fluorouracil, hydroxyurea, phenazine and valsartan on proliferation of NCM460, HCT116, and SW480 cells and their uptake efficiency. (A) CCK-8 assay showed the effects of 5-fluorouracil, hydroxyurea, phenazine and valsartan on NCM460 cells. (B)

CCK-8 assay showed the effects of 5-fluorouracil and hydroxyurea on HCT116 and SW480 cells. (C) CCK-8 assay showed the effects of phenazine and valsartan on HCT116 and SW480 cells. (D) The uptake of 5-fluorouracil, hydroxyurea, phenazine and valsartan in NCM460, HCT116 and SW480 cells over time. The data are represented as the mean  $\pm$  SD (n = 3). Statistical differences were considered significant at \* p < 0.05, \*\* p < 0.01, \*\*\* p < 0.001 and \*\*\*\* p < 0.0001.

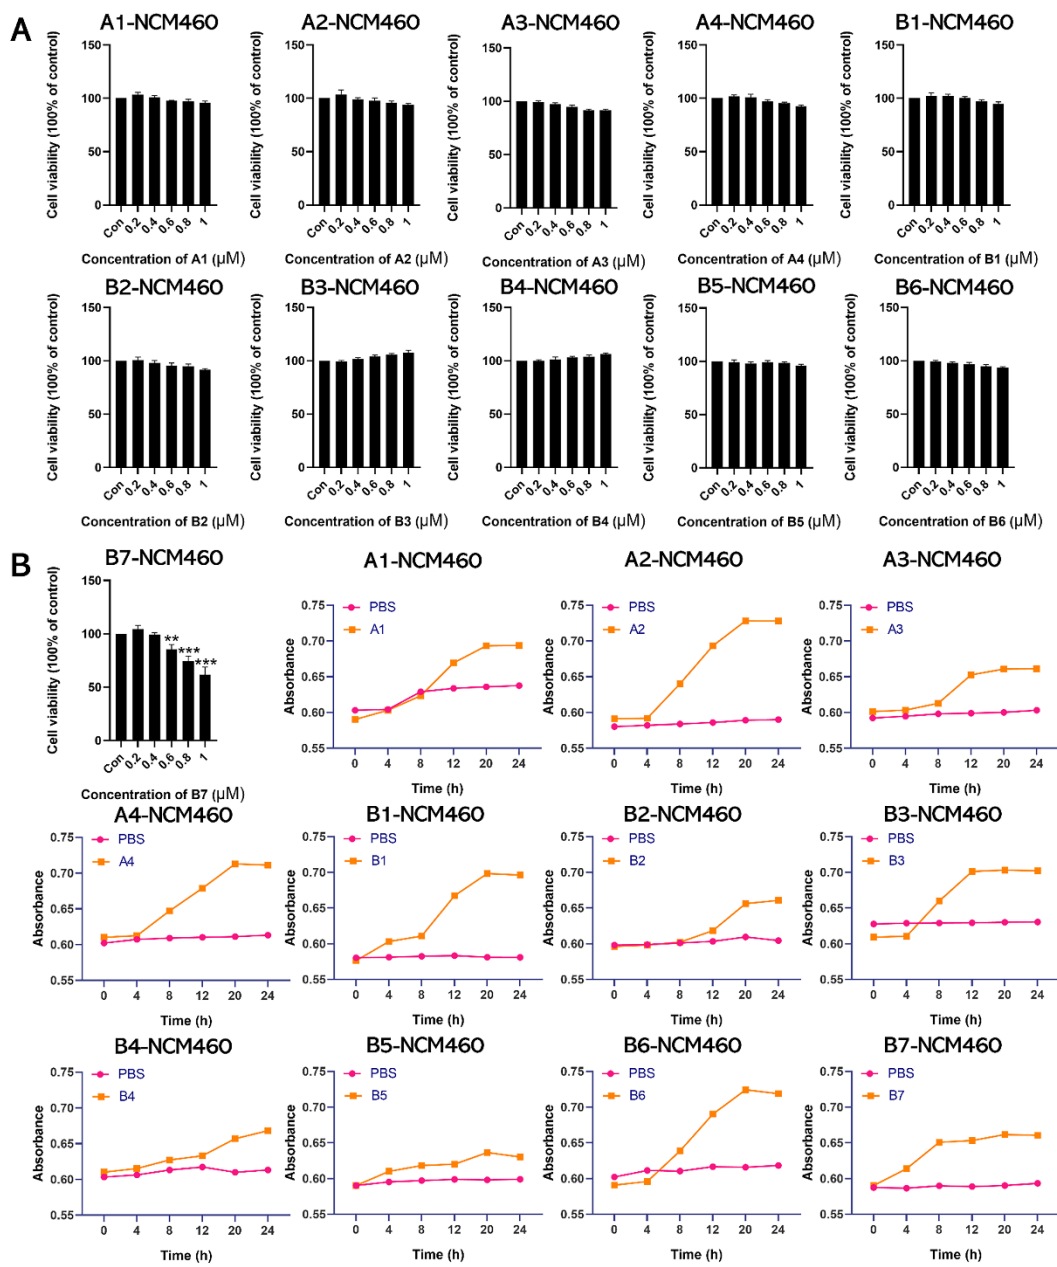

**Figure S2** Effects of A1-A4 and B1-B7 on the proliferation of NCM460 cells and their uptake efficiency. (A) CCK-8 assay showed the effects of A1-A4 and B1-B6 on NCM460 cells. (B) CCK-8 assay showed the effect of B7 on NCM460 cells. The uptake of A1-A4 and B1-B7 in NCM460 cells over time. The data are represented as the mean  $\pm$  SD ( $n = 3$ ). Statistical differences were considered significant at \*\*  $p < 0.01$  and \*\*\*  $p < 0.001$ .

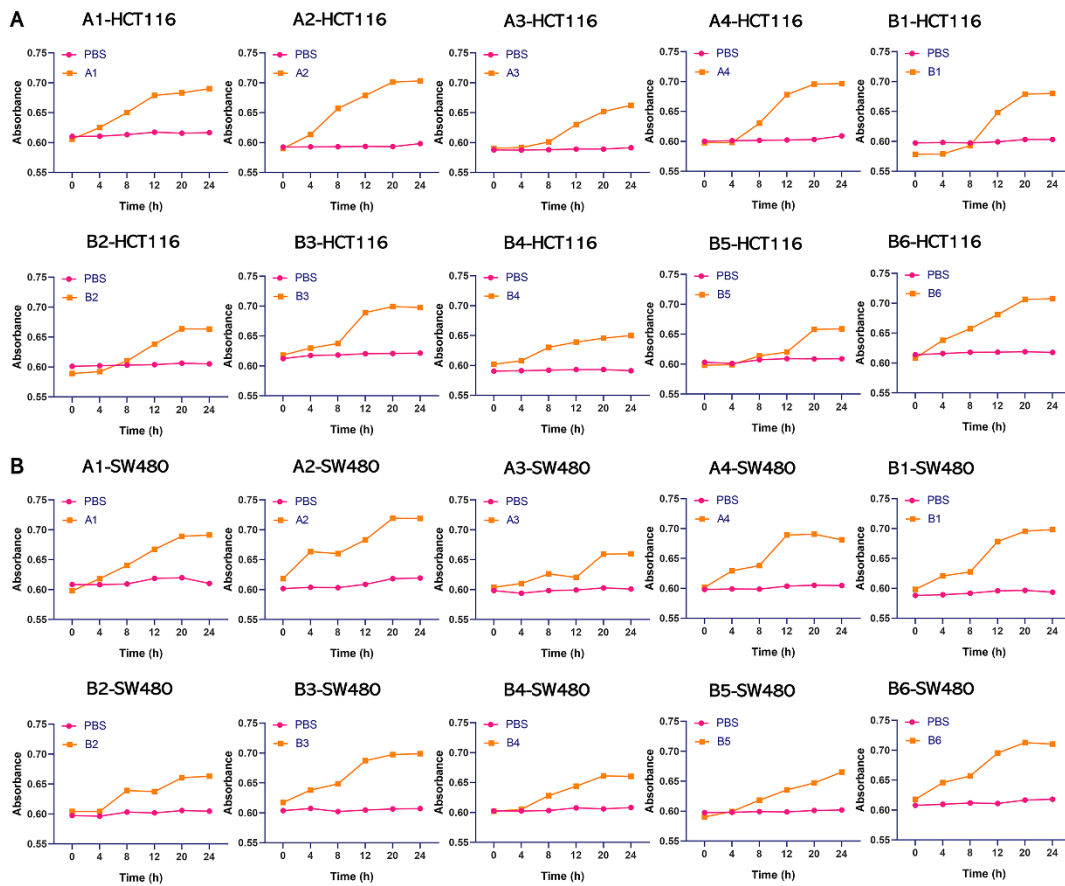

**Figure S3** The uptake of A1-A4 and B1-B6 in HCT116 and SW480 cells over time. (A) The uptake of A1-A4 and B1-B6 in HCT116 cells over time. (B) The uptake of A1-A4 and B1-B6 in SW480 cells over time.

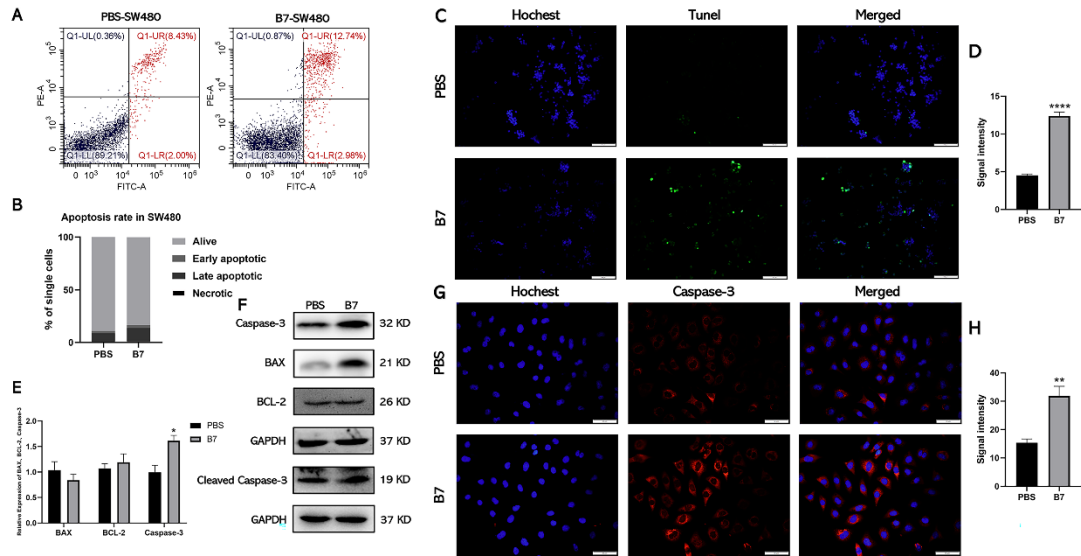

**Figure S4** B7 induces apoptosis of CRC cells by promoting the expression of Caspase-3. (A)

Flow cytometry was used to analyze the effect of B7 on SW480 cells apoptosis. (B) Statistical

analysis of the percentage of SW480 cells undergoing apoptosis. Statistical significances

between groups were evaluated using Student t-test for independent groups. (C) TUNEL

analysis of SW480 cells treated with B7 (scale bar=100 μm). And associated (D) statistical

analysis of TUNEL fluorescence signal intensity. (E) Relative gene expression of apoptosis

related genes in SW480 cells treated with PBS or B7. (F) Protein levels of BCL-2, BAX,

caspase-3, cleaved Caspase-3 and GAPDH in SW480 cells treated with PBS or B7. (G)

Fluorescent signal of Caspase-3 in SW480 cells treated with PBS or B7 (scale bar=50μm).

And associated (H) statistical analysis of the Caspase-3 intensity. The data are represented

as the mean ± SD (n = 3). Statistical differences were considered significant at \* p < 0.05, \*\* p

< 0.01 and \*\*\*\* p < 0.0001.

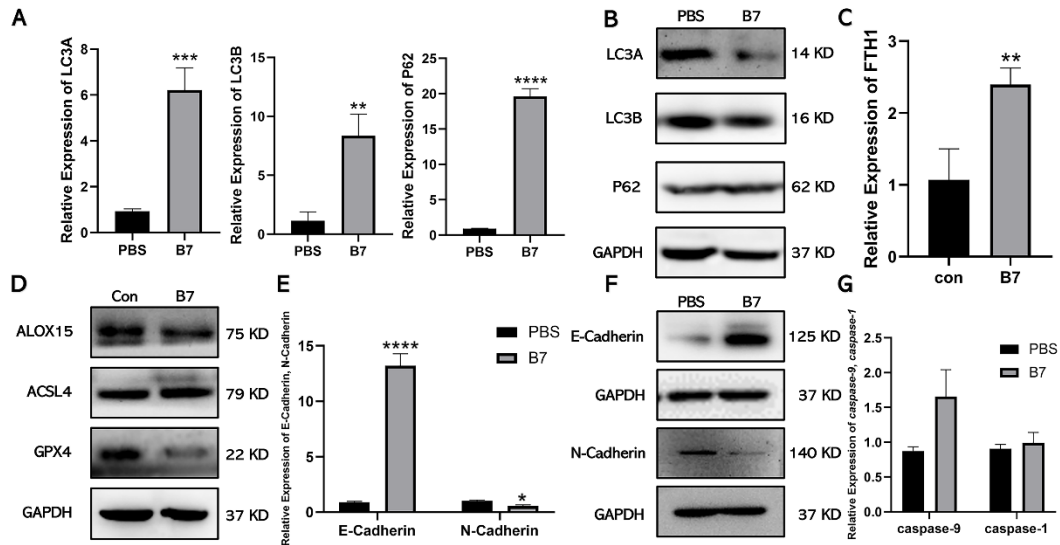

**Figure S5** Effect of B7 on the expression of autophagy, feline apoptosis, metastasis and apoptosis-related genes in CRC cells. (A) *LC3A*, *LC3B* and *P62* were analyzed by qPCR. (B) Expression levels of *LC3A*, *LC3B*, *P62* and *GAPDH* protein was assessed via Western blotting. (C) *FTH1* were analyzed by qPCR. (D) Expression levels of *ALOX15*, *ACSL4*, *GPX4* and *GAPDH* protein was assessed via Western blotting. (E) *E-Cadherin* and *N-Cadherin* were analyzed by qPCR. (F) Expression levels of *E-Cadherin*, *N-Cadherin* and *GAPDH* protein was assessed via Western blotting. (G) *Caspase-9*, *caspase-1* were analyzed by qPCR. The data are represented as the mean  $\pm$  SD (n = 3). Statistical differences were considered significant at \* p < 0.05, \*\* p < 0.01, \*\*\* p < 0.001 and \*\*\*\* p < 0.0001.

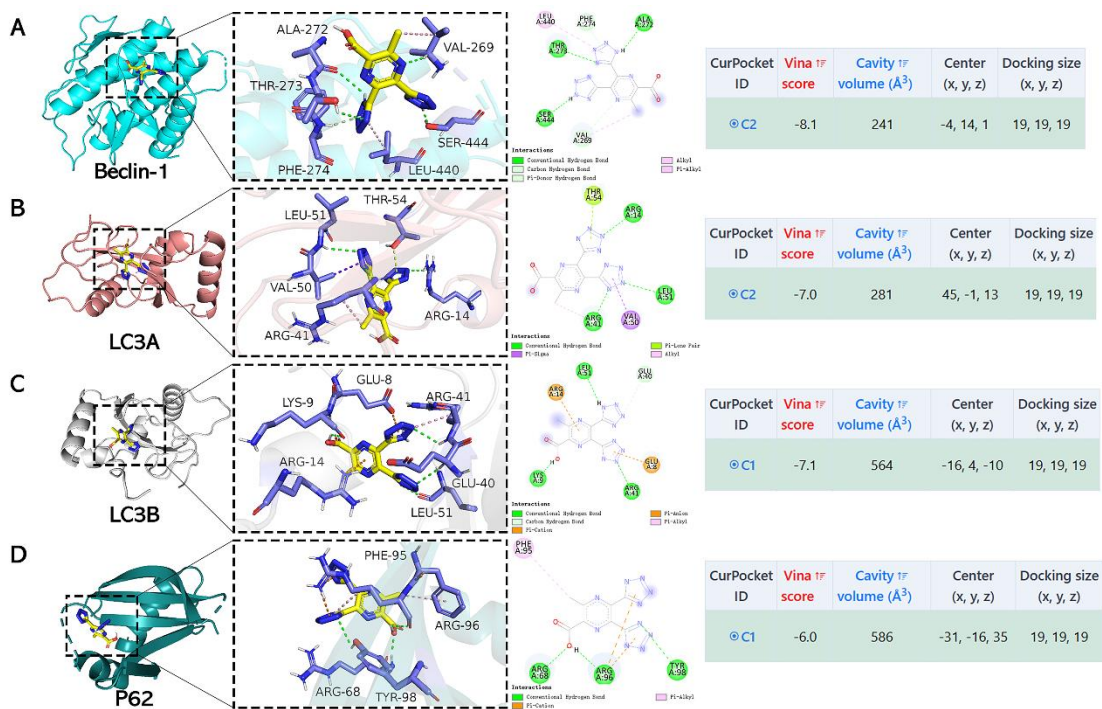

**Figure S6** Molecular docking of autophagy-associated protein with compound B7. (A)

Molecular docking and binding energy analysis of Beclin-1 protein with compound B7. (B)

Molecular docking and binding energy analysis of LC3A protein with compound B7. (C)

Molecular docking and binding energy analysis of LC3B protein with compound B7. (D)

Molecular docking and binding energy analysis of P62 protein with compound B7.

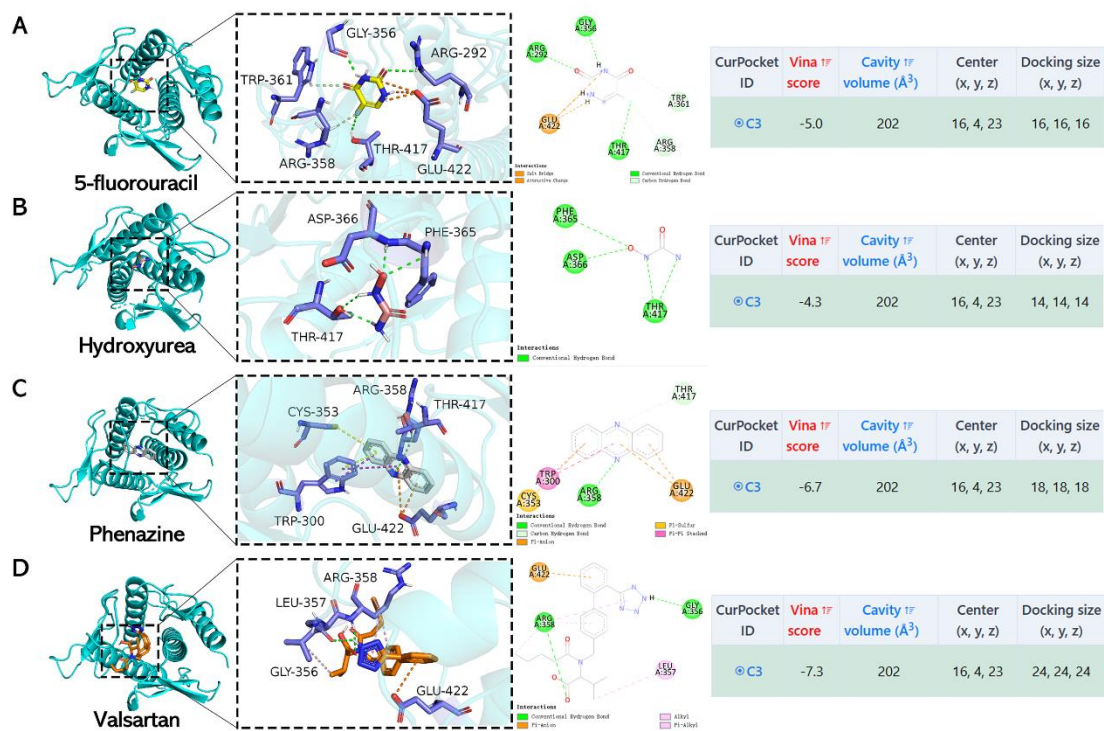

**Figure S7** Molecular docking of Beclin-1 with compounds 5-fluorouracil, hydroxyurea, phenazine and valsartan. (A) Molecular docking and binding energy analysis of Beclin-1 protein with 5-fluorouracil. (B) Molecular docking and binding energy analysis of Beclin-1 protein with hydroxyurea. (C) Molecular docking and binding energy analysis of Beclin-1 protein with phenazine. (D) Molecular docking and binding energy analysis of Beclin-1 protein with valsartan.

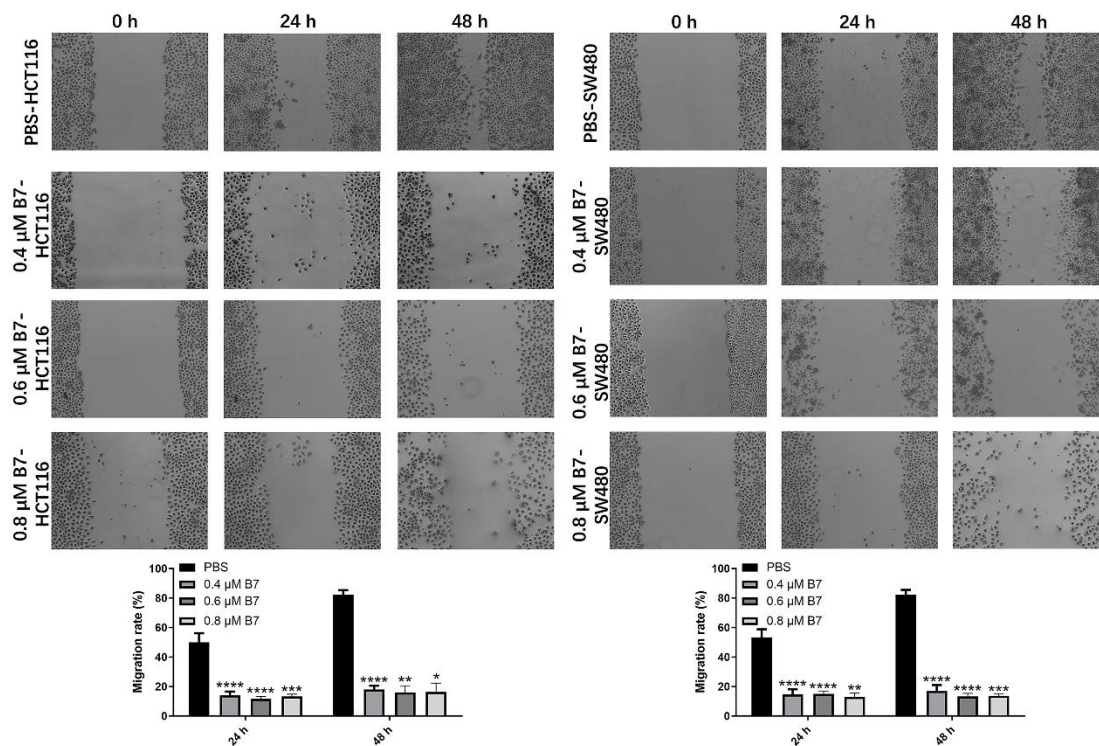

**Figure S8** B7 inhibits the migration of CRC. Wound-healing assay images (100x magnification) from HCT116 and SW480 cells treated with PBS and B7 (0.4, 0.6 and 0.8 μM) and statistical analysis of cell migration. Statistical differences were considered significant at \*  $p < 0.05$ , \*\*  $p < 0.01$ , \*\*\*  $p < 0.001$ , and \*\*\*\*  $p < 0.0001$ .

#### Data S1:

The data of the compound structures examined using  $^1\text{H}$  NMR,  $^{13}\text{C}$  NMR, and HRMS spectra:

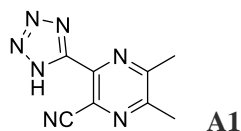

$^1\text{H}$  NMR (400 MHz, DMSO)  $\delta$  2.69 (s, 3H), 2.63 (s, 3H).  $^{13}\text{C}$  NMR (101 MHz, DMSO)  $\delta$  158.0, 156.4, 153.6, 139.4, 124.0, 116.2, 91.5, 22.7, 22.1.

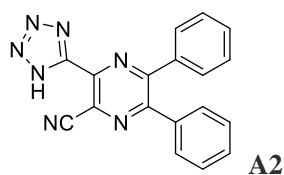



$^1\text{H}$  NMR (400 MHz, DMSO)  $\delta$  7.56 – 7.37 (m, 10H).  $^{13}\text{C}$  NMR (101 MHz, DMSO)  $\delta$  151.2, 150.7, 150.7, 146.9, 139.8, 136.9, 136.3, 133.5, 132.3, 132.3, 127.2, 127.2, 127.1, 115.8.

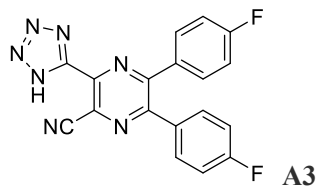

$^1\text{H}$  NMR (400 MHz, DMSO)  $\delta$  7.69 – 7.63 (m, 2H), 7.57 – 7.50 (m, 2H), 7.33 – 7.25 (m, 4H).  $^{13}\text{C}$  NMR (101 MHz, DMSO)  $\delta$  162.6, 162.3, 154.3, 152.9, 152.7, 139.4, 133.0, 132.8, 132.7, 132.5, 124.2, 116.2.

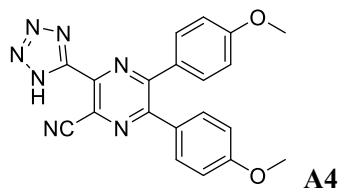

$^1\text{H}$  NMR (400 MHz, DMSO)  $\delta$  3.81 (s, 3H), 3.75 (s, 3H).  $^{13}\text{C}$  NMR (101 MHz, DMSO)  $\delta$  161.8, 161.3, 153.9, 152.9, 138.6, 132.7, 131.6, 131.1, 129.7, 128.3, 123.6, 116.5, 114.8, 114.5, 55.9, 55.8.

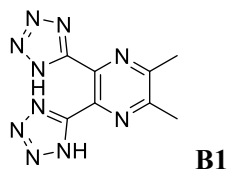

$^1\text{H}$  NMR (400 MHz, DMSO)  $\delta$  2.70 (s, 1H).  $^{13}\text{C}$  NMR (151 MHz, DMSO)  $\delta$  160.3, 158.3, 141.2, 27.0.

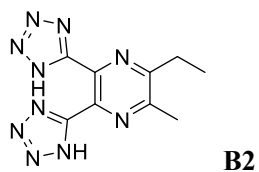

$^1\text{H}$  NMR (400 MHz, DMSO)  $\delta$  3.03 (q,  $J = 7.5$  Hz, 1H), 2.73 (s, 1H), 1.32 (t,  $J = 7.3$  Hz, 1H).  $^{13}\text{C}$  NMR (101 MHz, DMSO)  $\delta$  159.1, 155.0, 153.5, 144.8, 143.5, 136.3, 27.6, 21.8, 11.6.

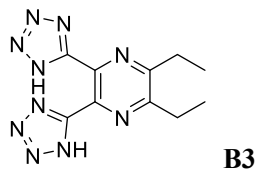

$^1\text{H}$  NMR (400 MHz, DMSO)  $\delta$  3.05 (q,  $J = 7.4$  Hz, 1H), 1.33 (t,  $J = 7.4$  Hz, 1H).  $^{13}\text{C}$  NMR (101 MHz, DMSO)  $\delta$  158.6, 153.6, 136.5, 27.1, 12.1.

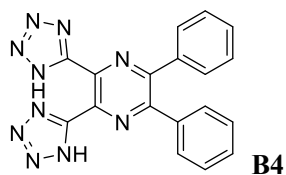

$^1\text{H}$  NMR (400 MHz, DMSO)  $\delta$  7.53 – 7.35 (m, 1H).  $^{13}\text{C}$  NMR (101 MHz, DMSO)  $\delta$  155.3, 152.8, 137.1, 136.0, 130.3, 130.1, 128.9.

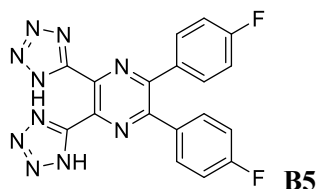

$^1\text{H}$  NMR (400 MHz, DMSO)  $\delta$  7.74 – 7.62 (m, 1H), 7.60 – 7.50 (m, 1H), 7.34 – 7.21 (m, 2H).  $^{13}\text{C}$  NMR (101 MHz, DMSO) 164.4 (d,  $J$  = 61.5 Hz), 162.8 (d,  $J$  = 60.1 Hz), 154.3, 153.7, 151.9, 132.7 (d,  $J$  = 8.3 Hz), 116.3 (d,  $J$  = 22.0 Hz), 116.0 (d,  $J$  = 21.8 Hz).

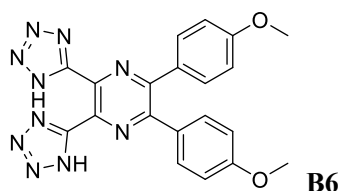

$^1\text{H}$  NMR (400 MHz, DMSO)  $\delta$  7.56 – 7.52 (m, 4H), 7.31 – 7.22 (m, 4H), 3.78 (s, 6H).  $^{13}\text{C}$  NMR (101 MHz, DMSO)  $\delta$  158.4, 152.2, 131.1, 129.1, 128.9, 127.5, 113.8, 55.4.

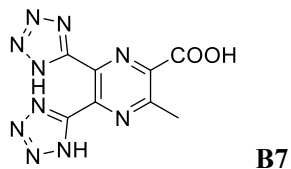

$^1\text{H}$  NMR (400 MHz, DMSO)  $\delta$  2.91 (s, 1H).  $^{13}\text{C}$  NMR (101 MHz, DMSO)  $\delta$  165.9, 155.5, 153.6, 153.4, 145.0, 140.3, 136.7, 23.1.

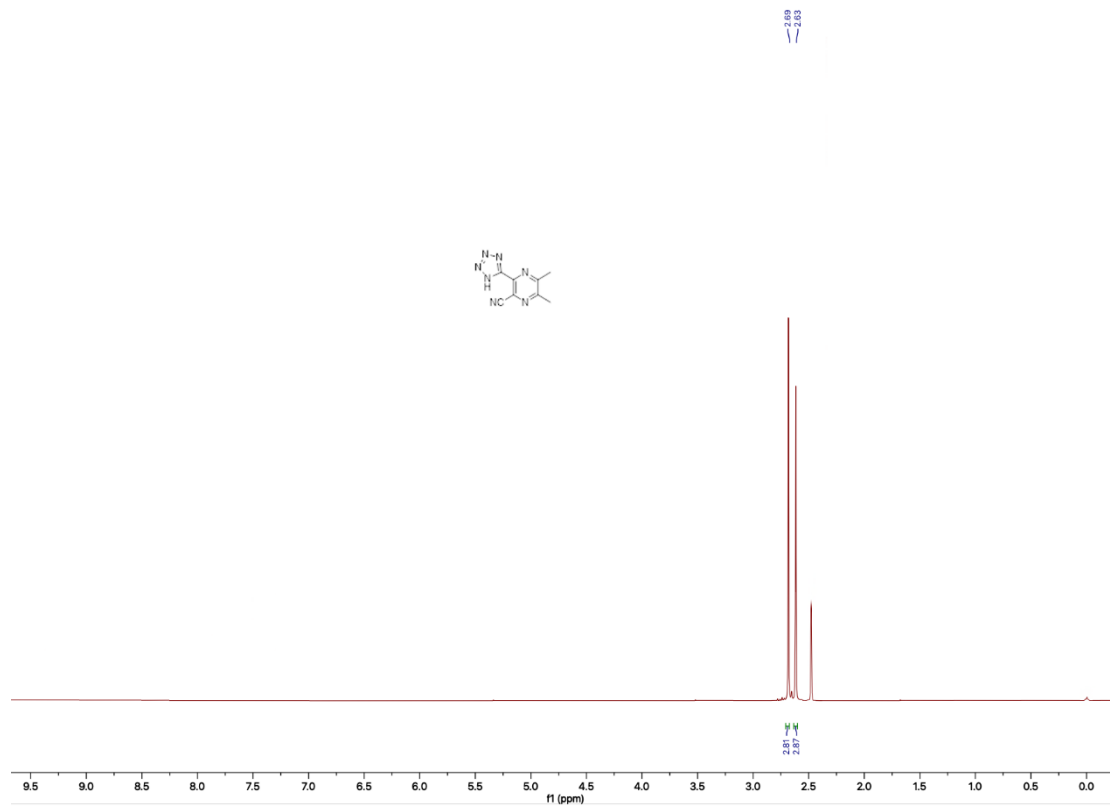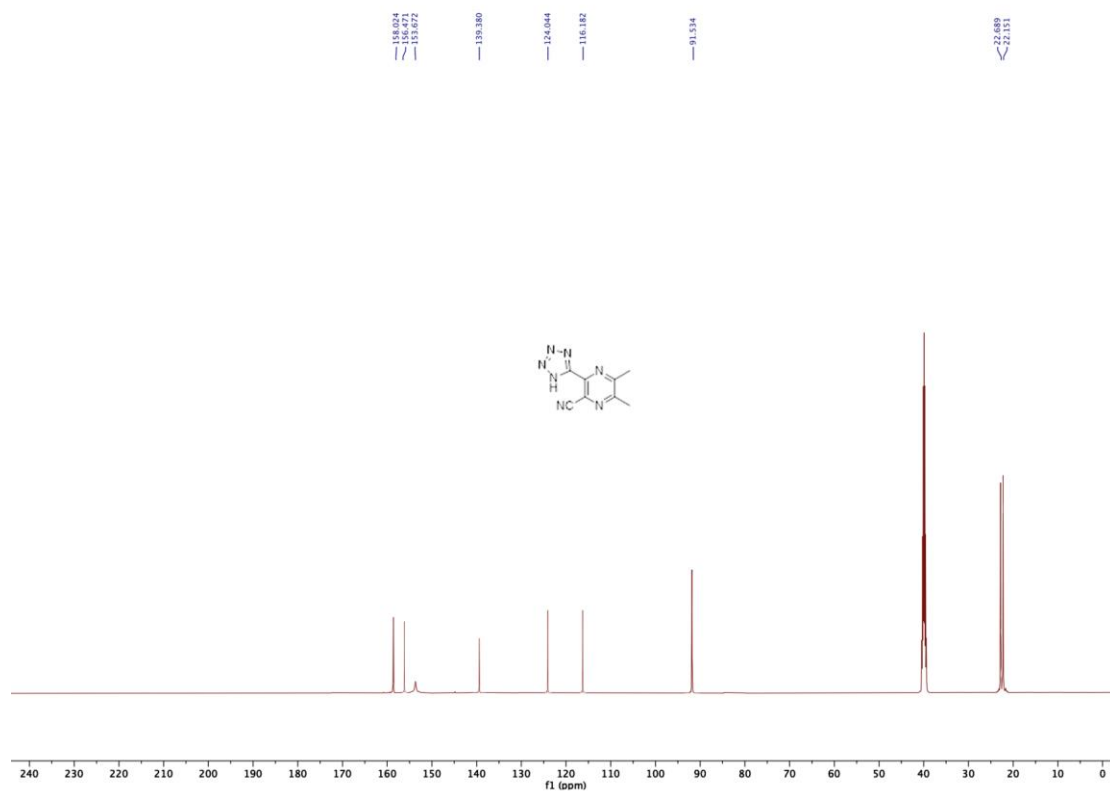

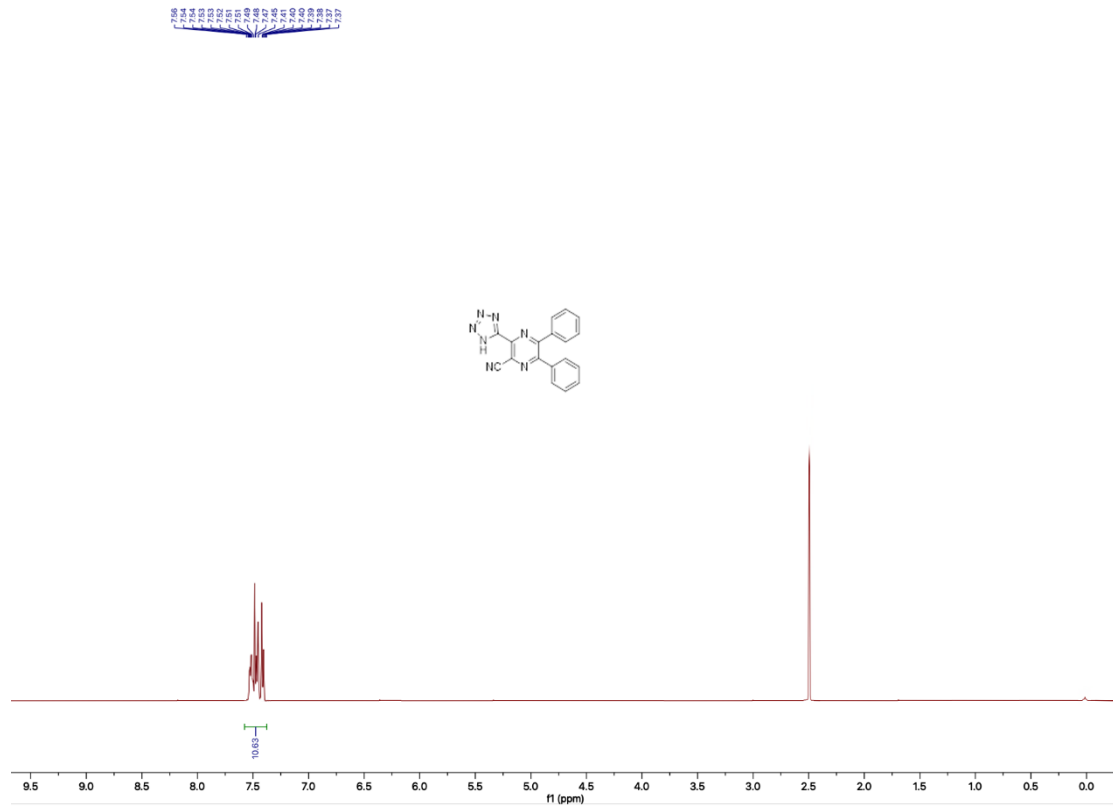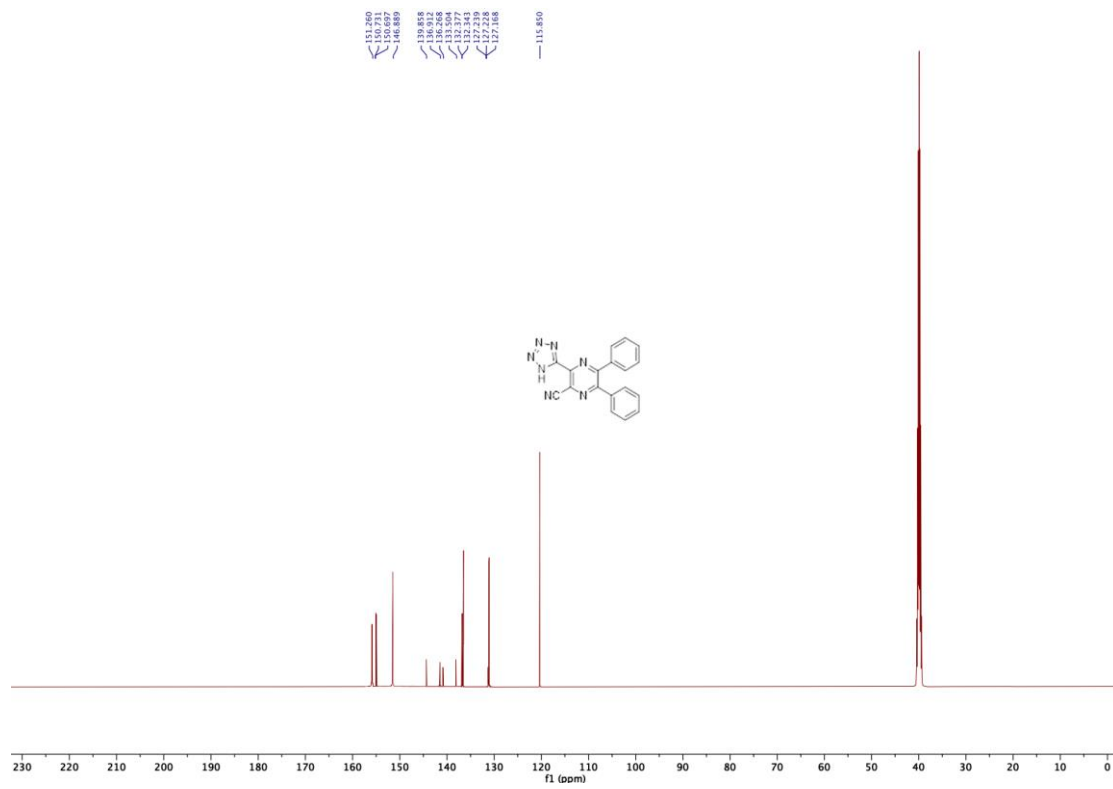

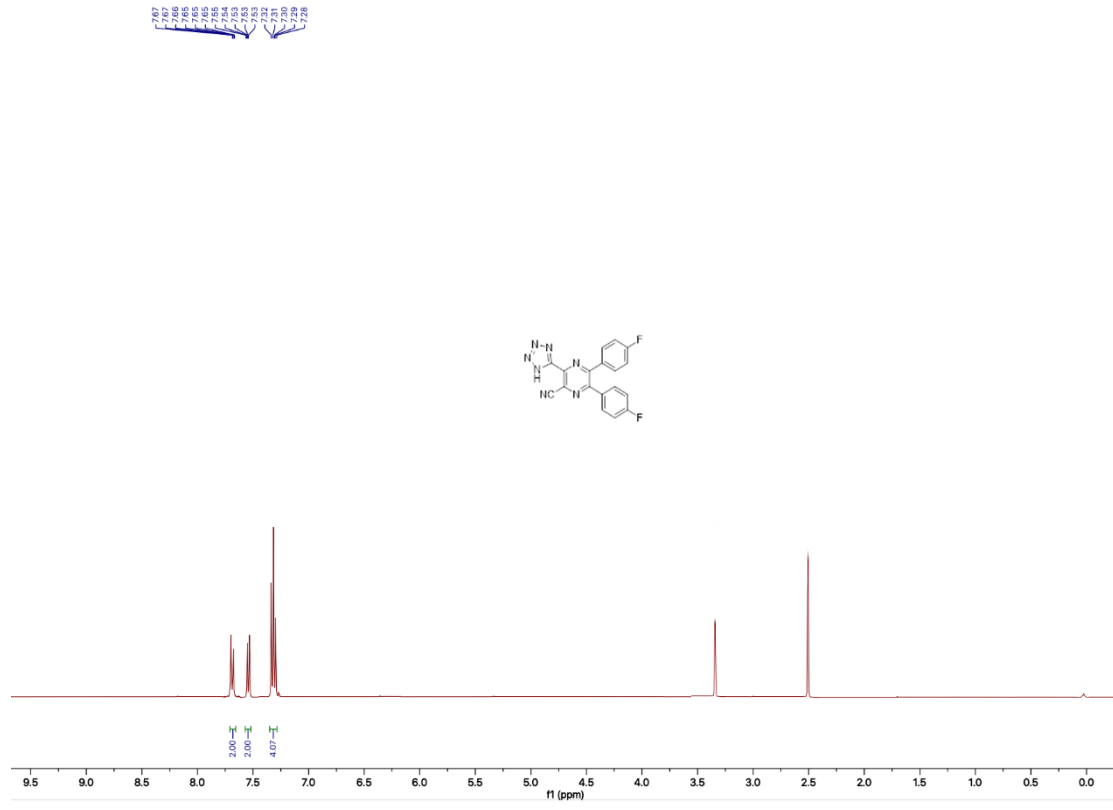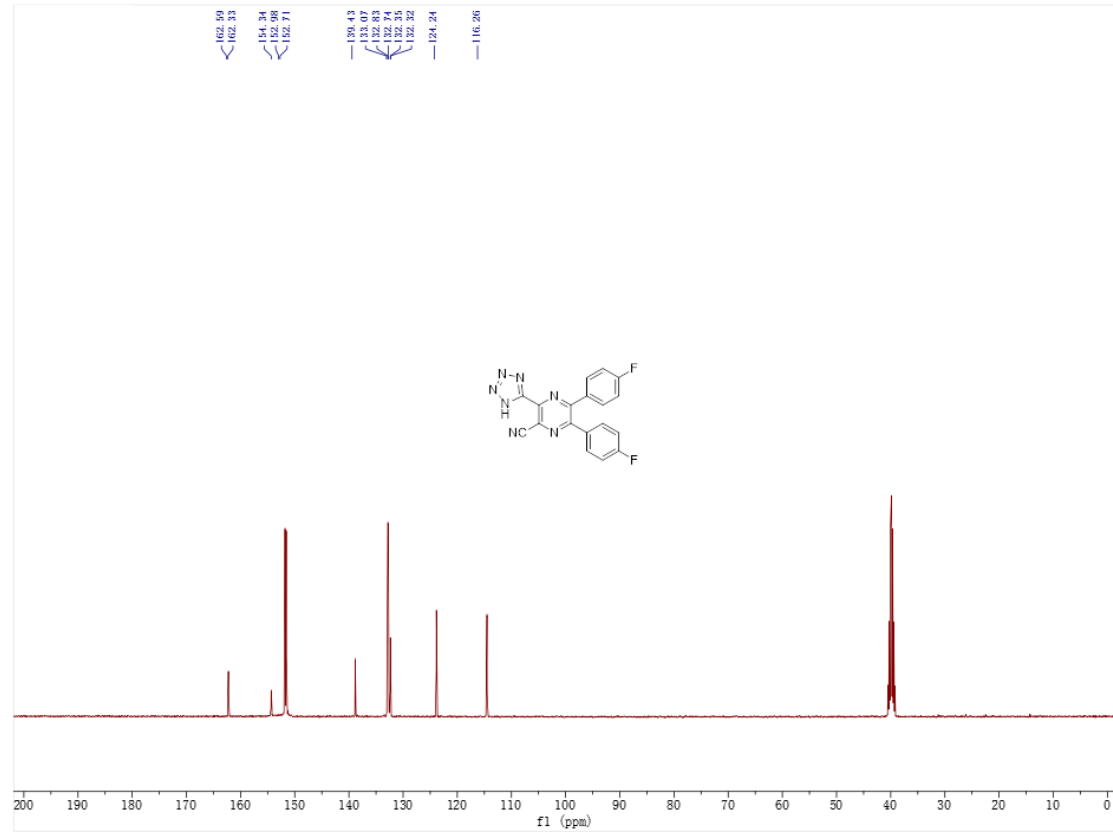

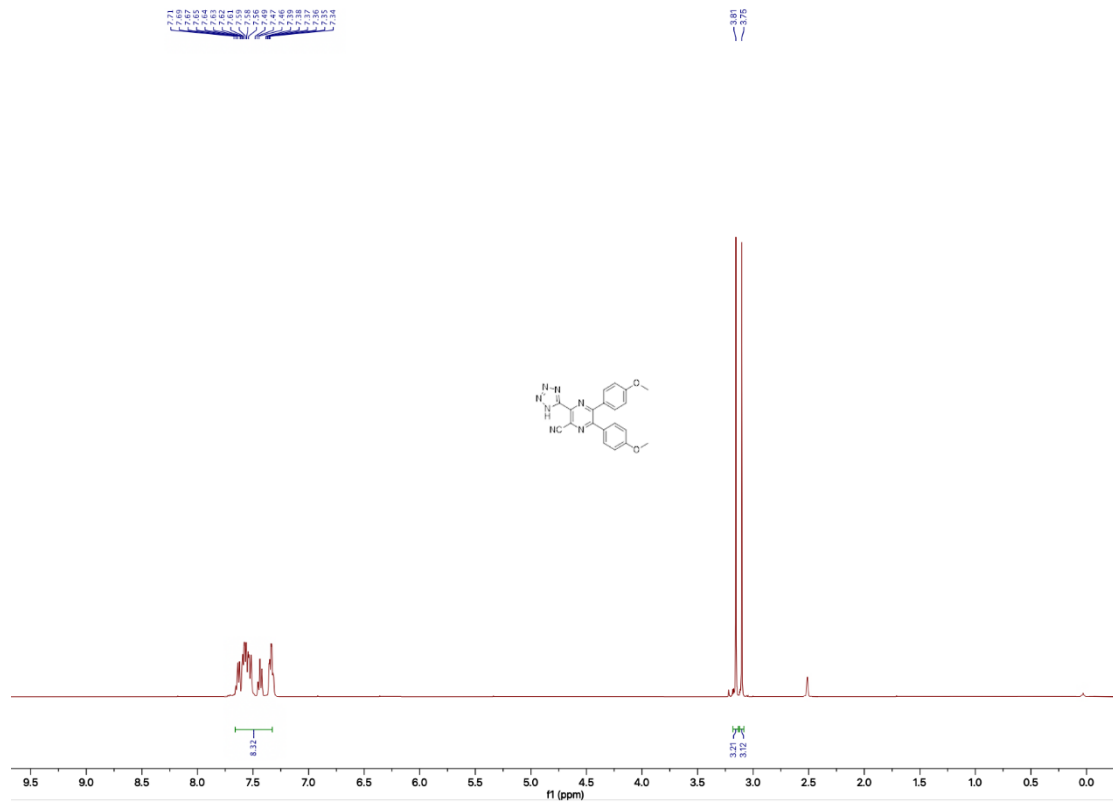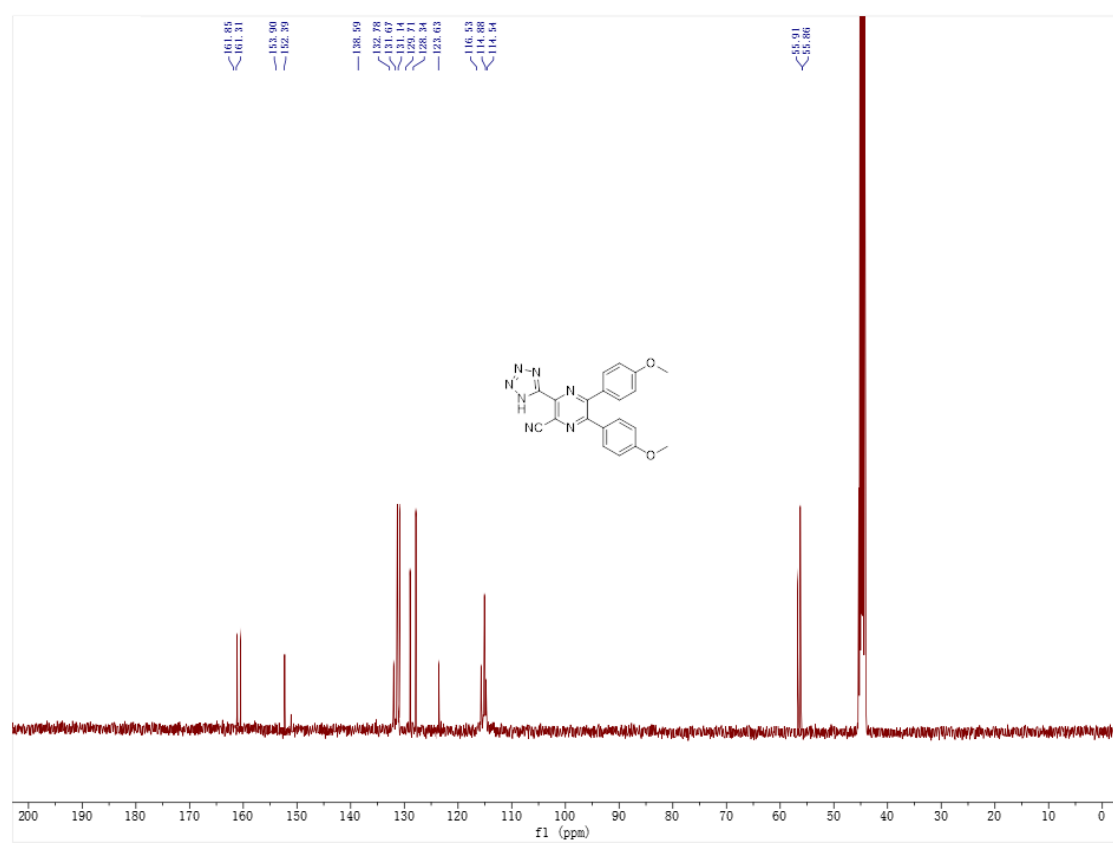

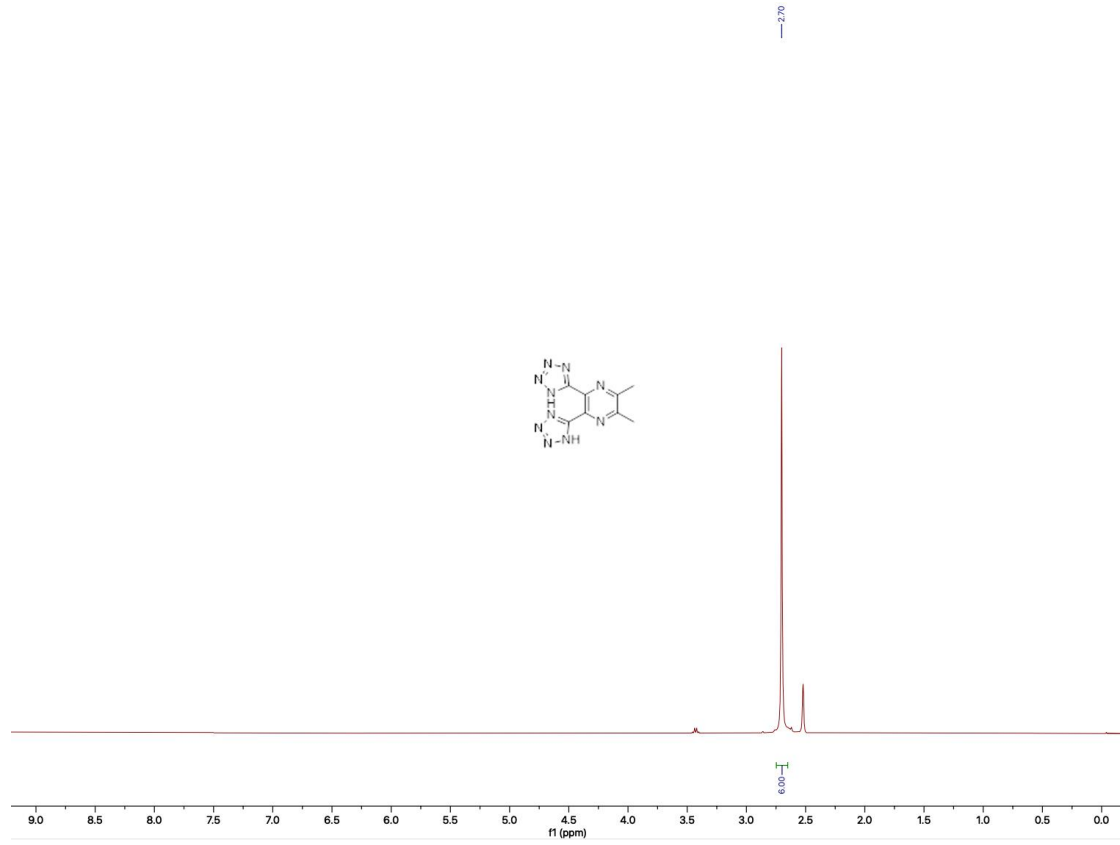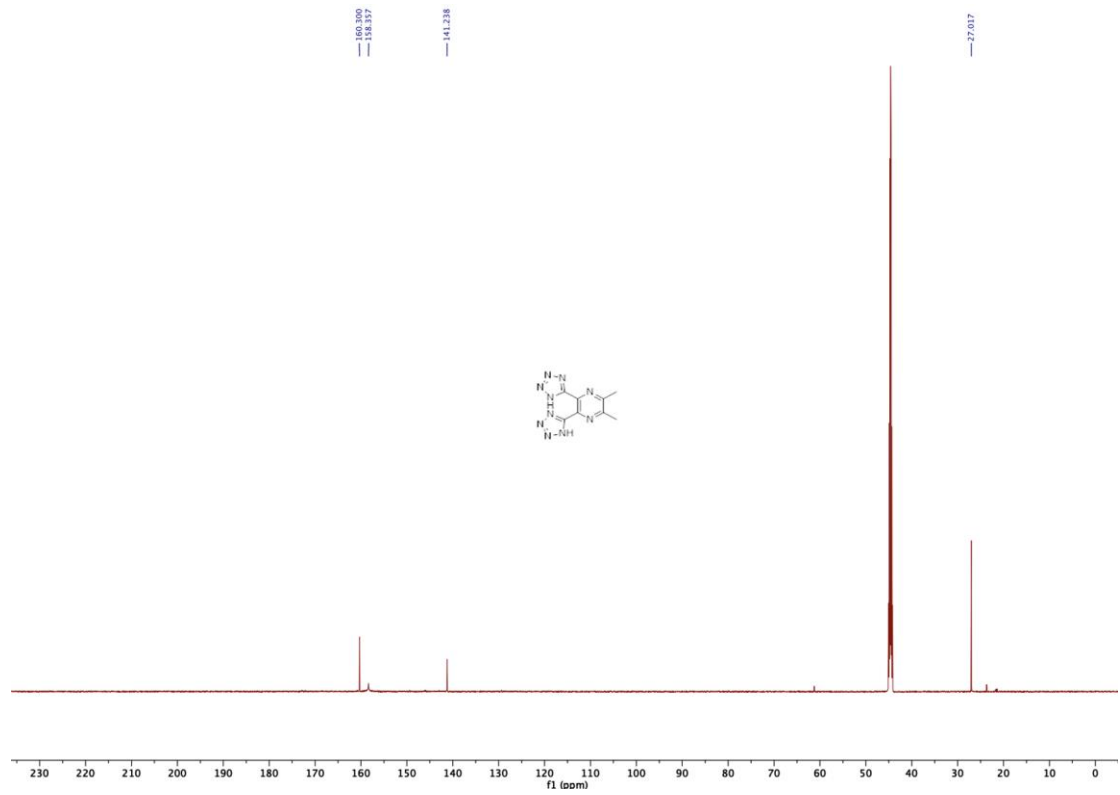

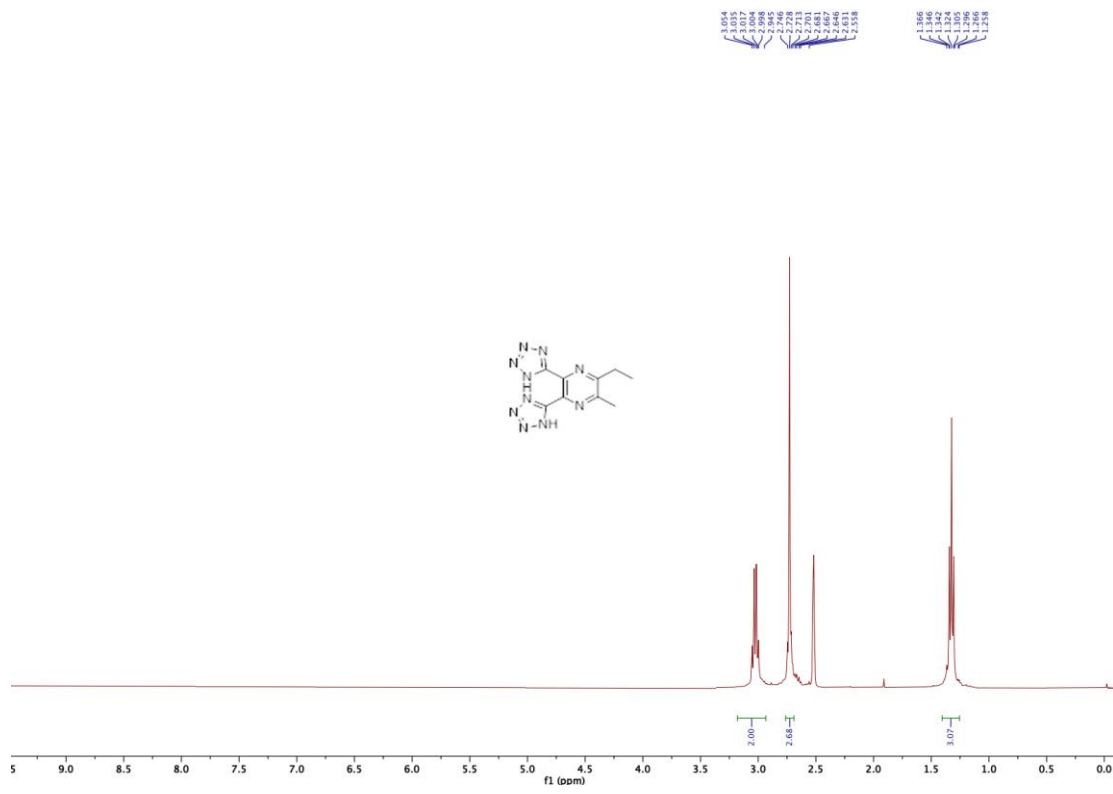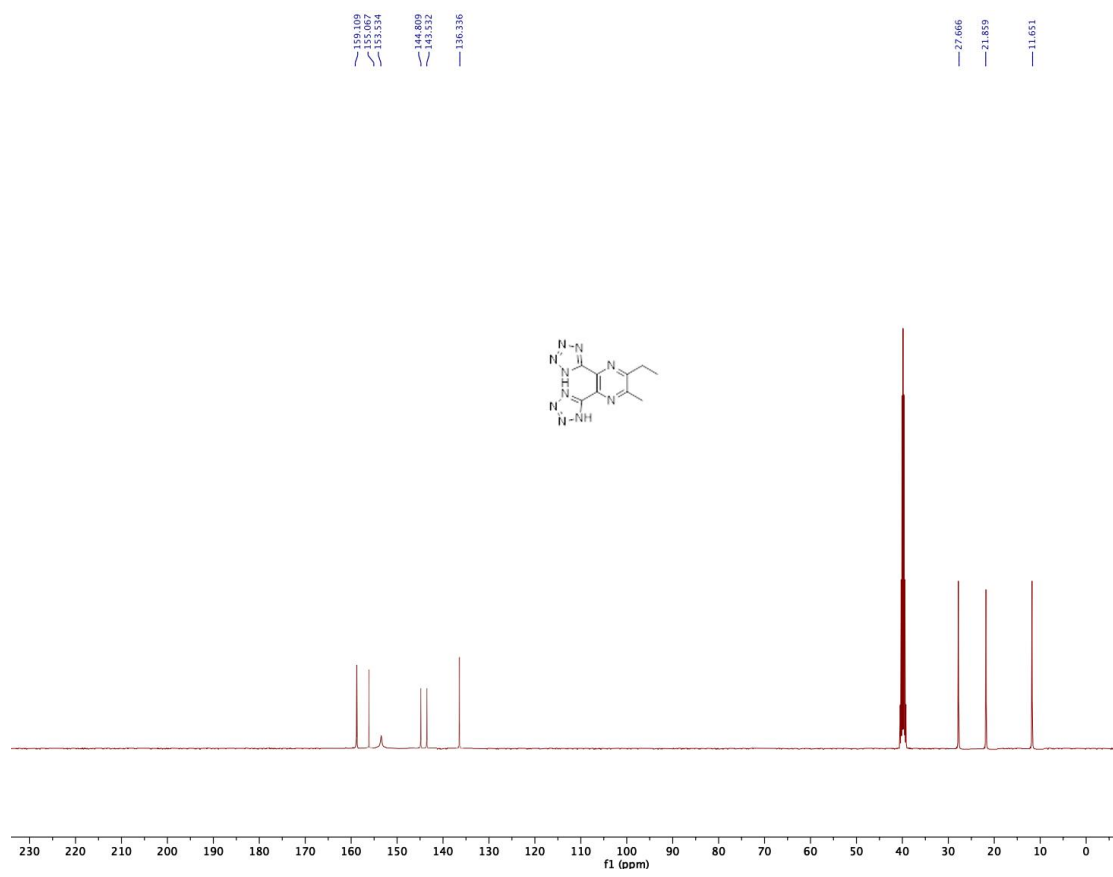



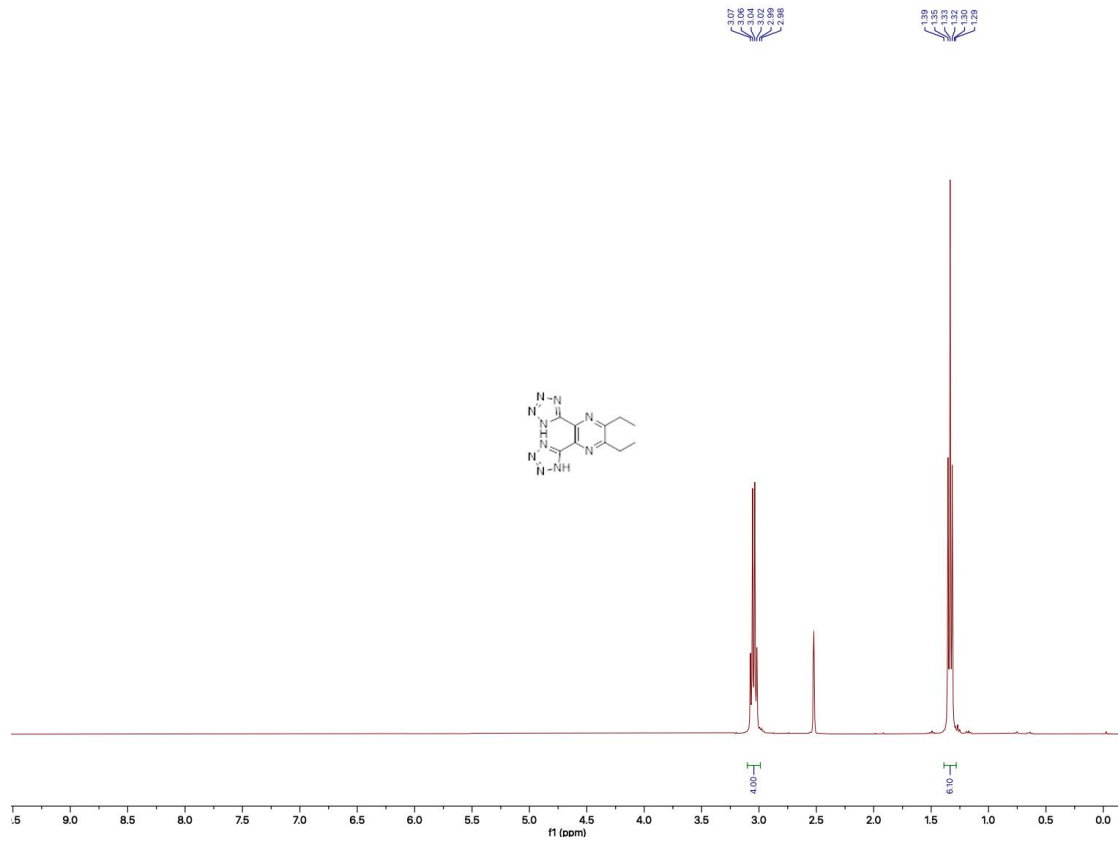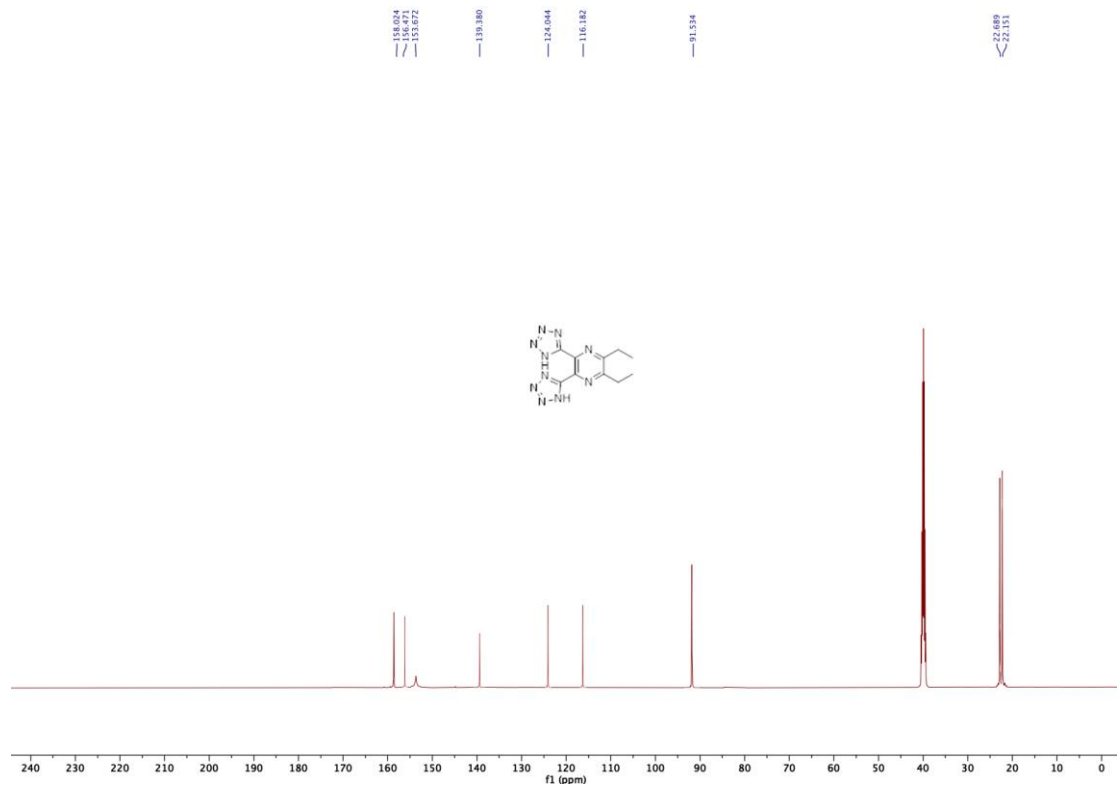

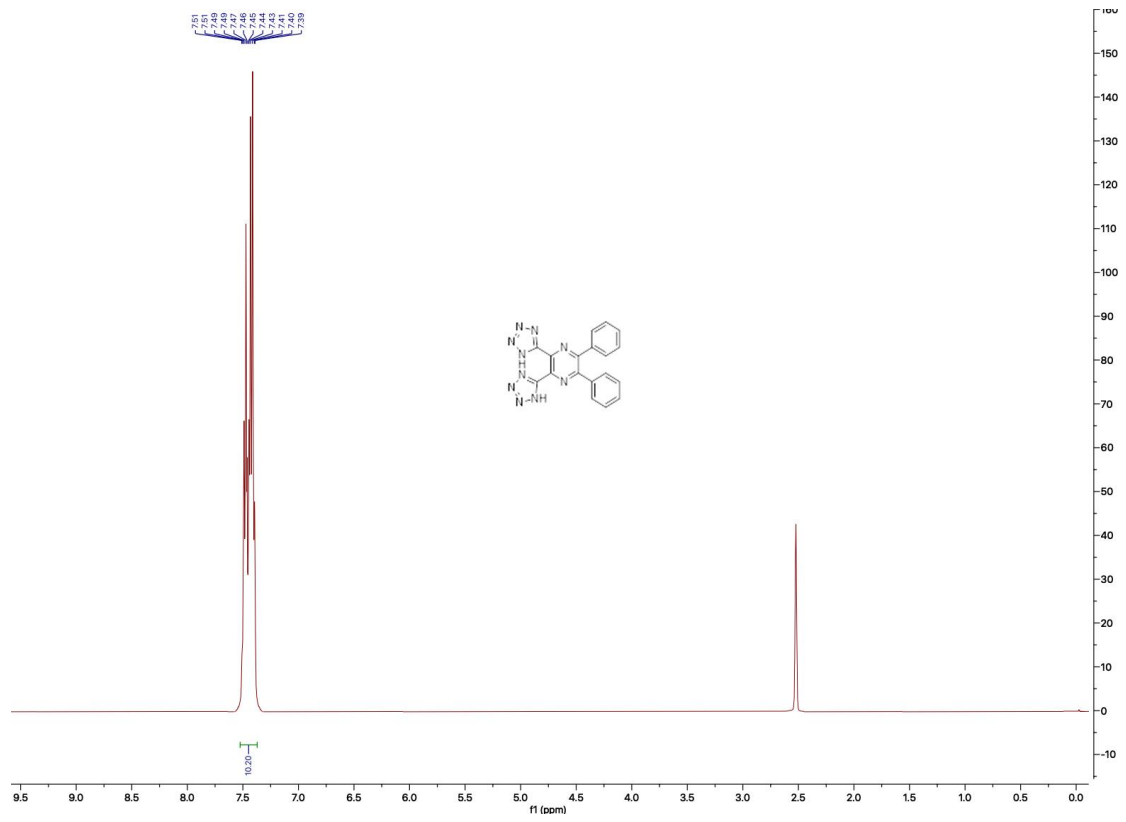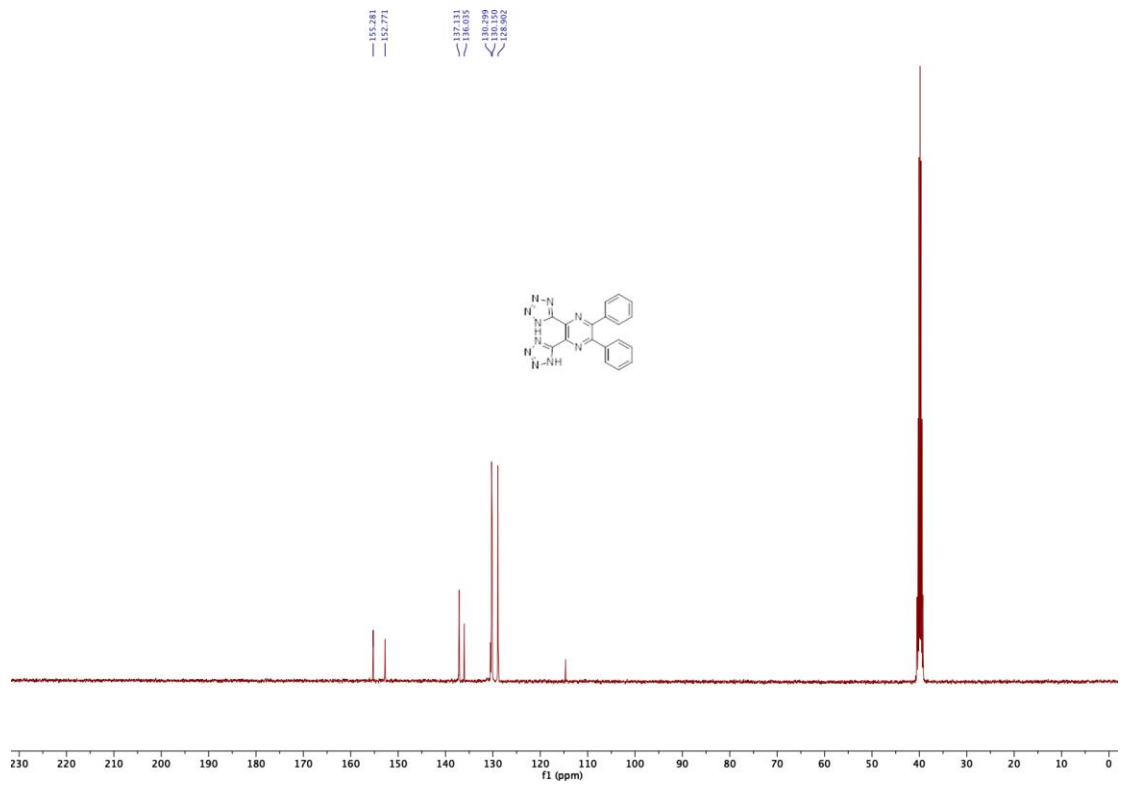

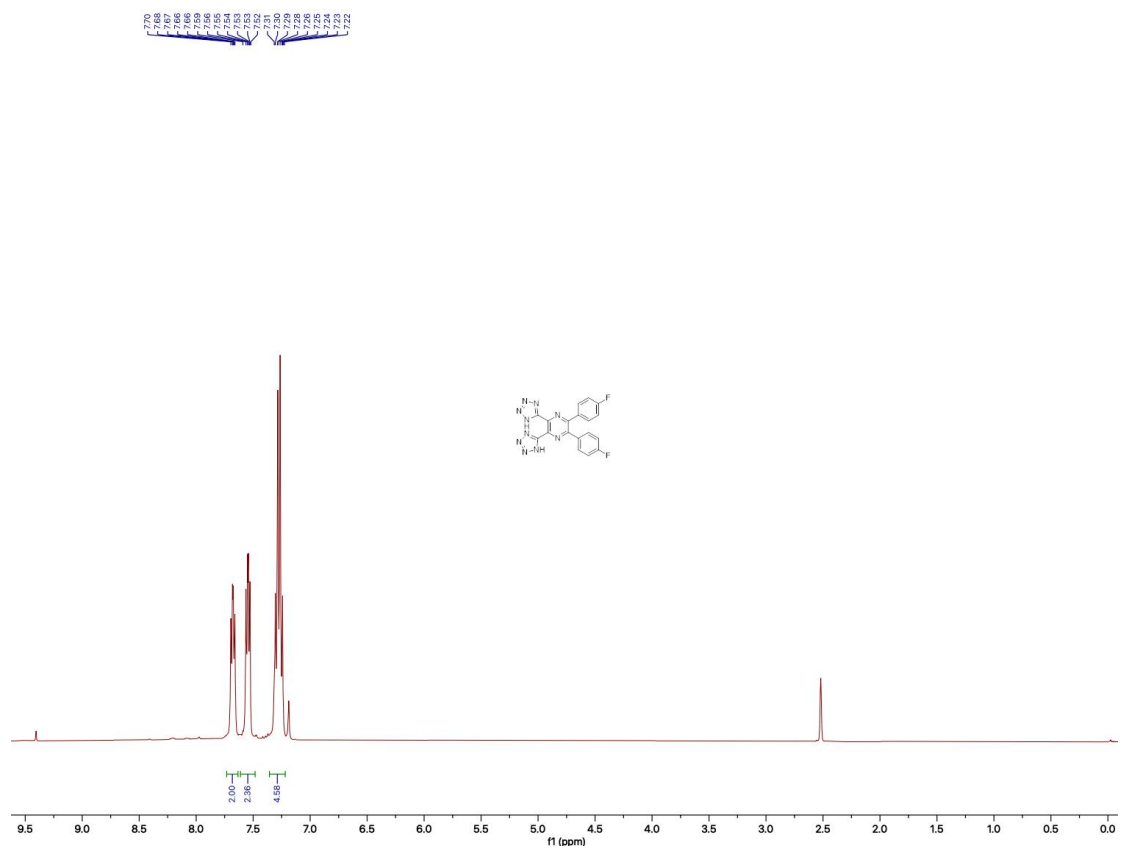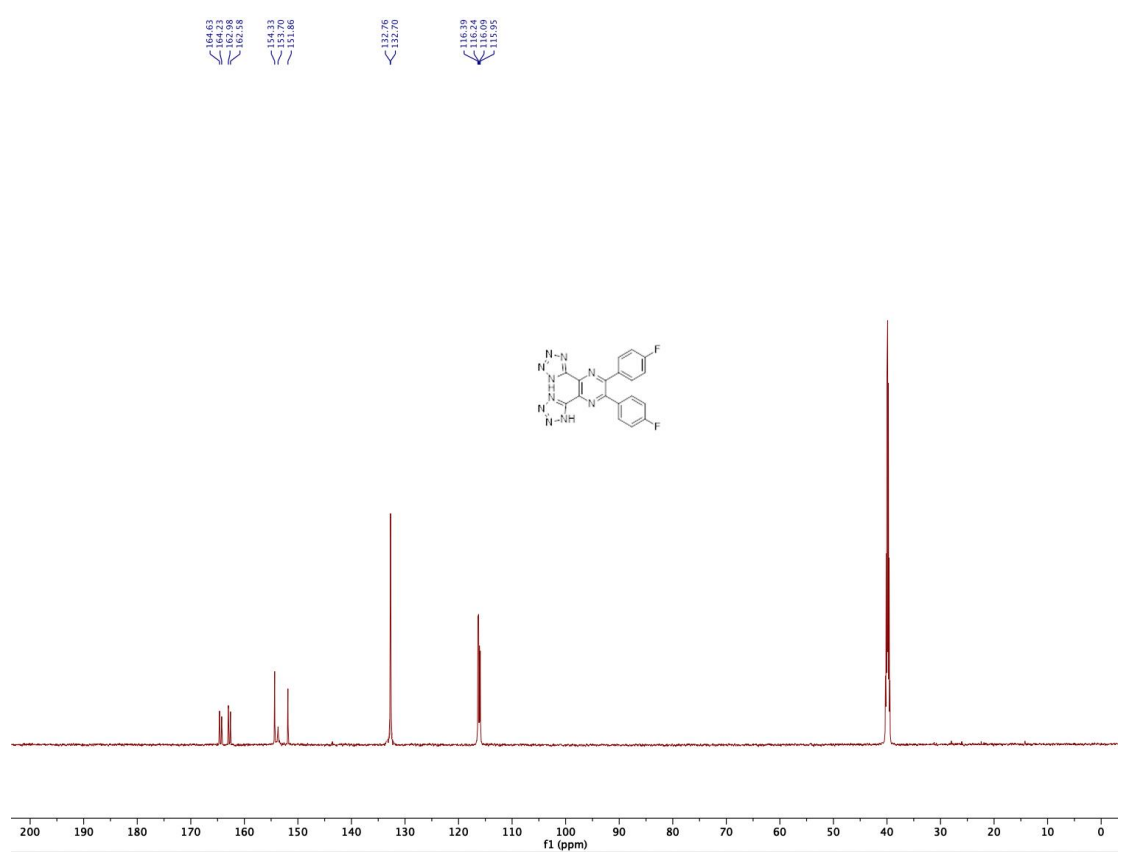

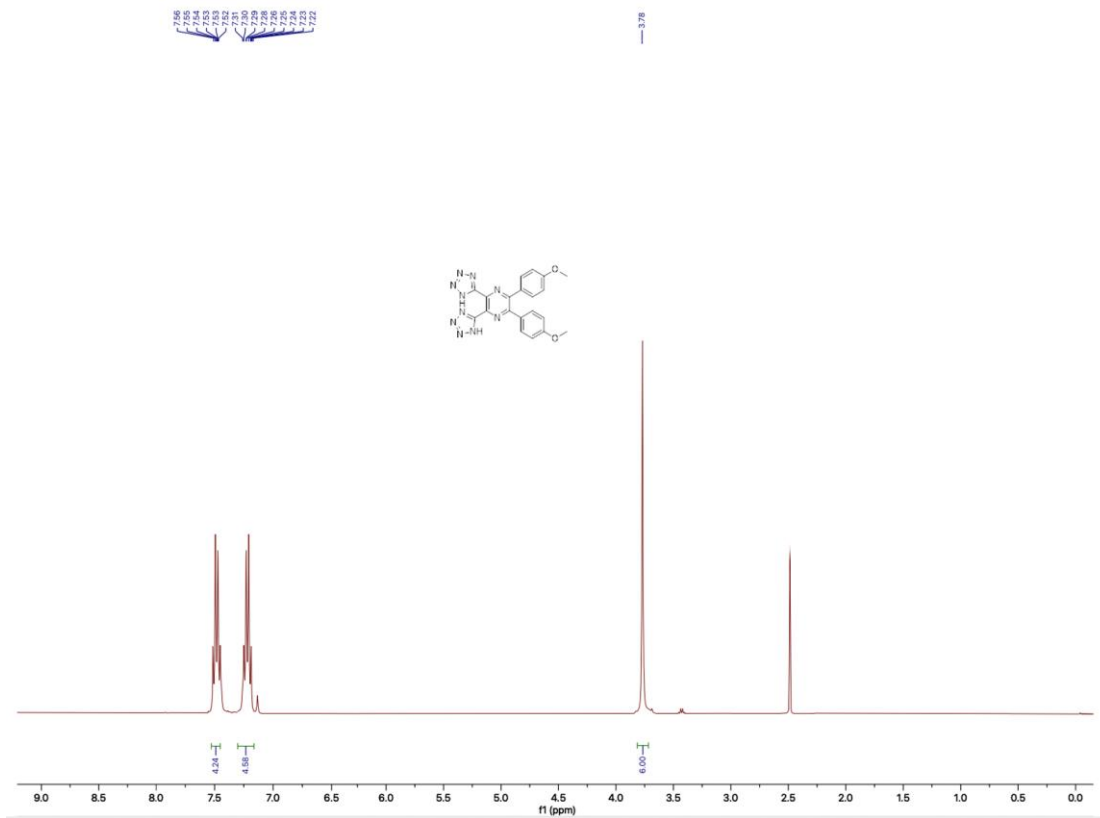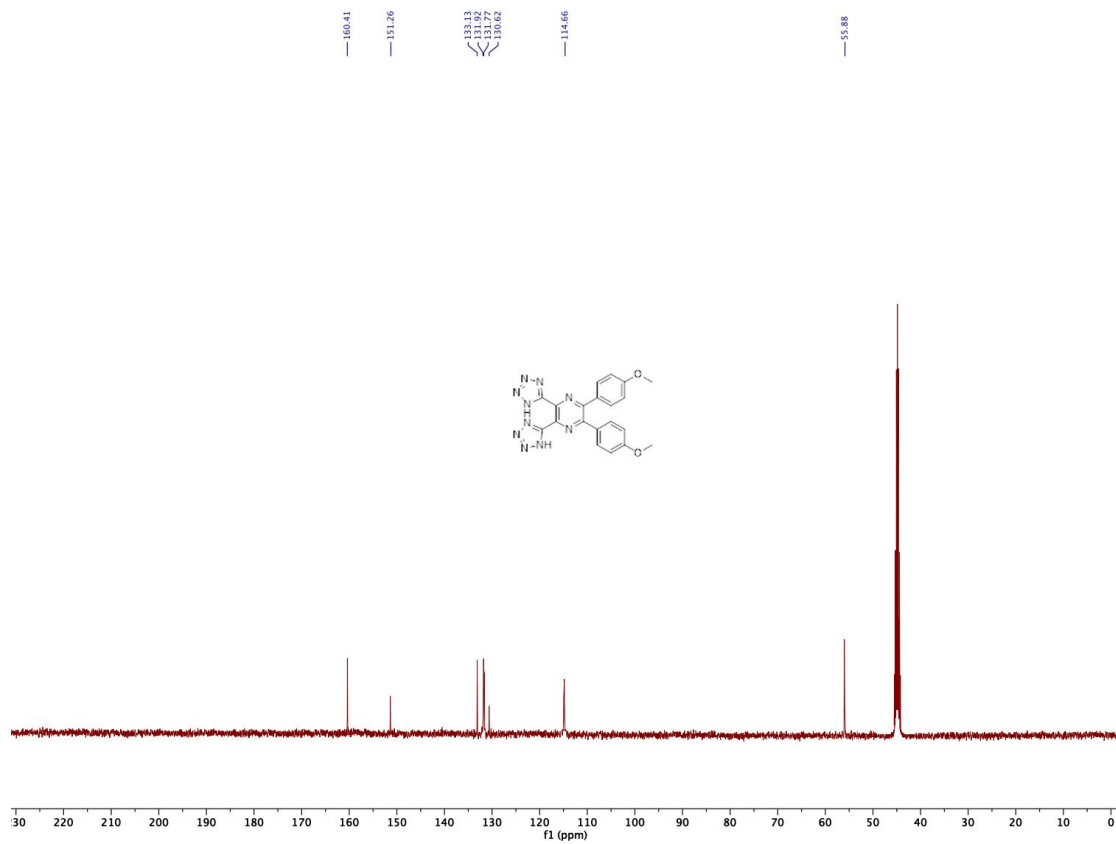

1.1.fid

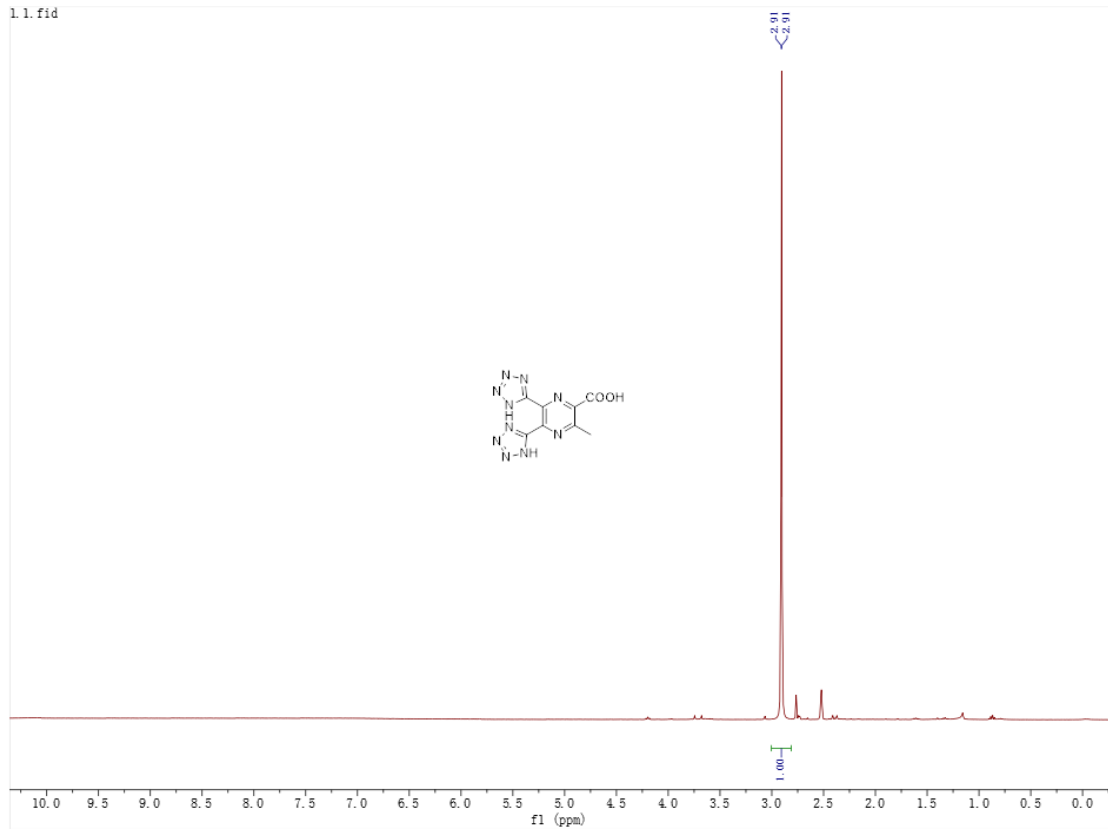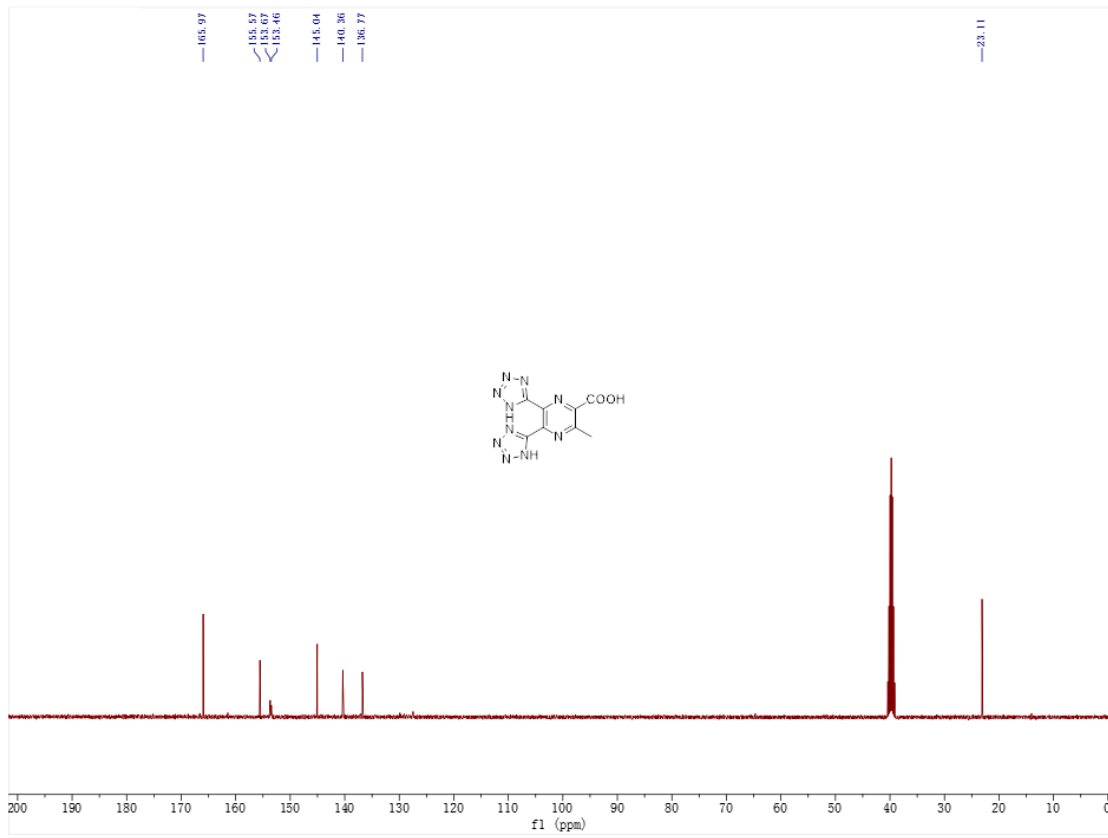

Supplement: Supplementary file 1 [file get_supplementary_file.php]
